# Supplementary material for: Modelling below-cloud scavenging of size resolved particles in GEM-MACHv3.1
Source: Copernicus journal article supplement (doi:10.5194/gmd-2023-86), 2023-06-06
Supplement: Supplementary file 1 [file gmd-2023-86-supplement.pdf]

*Supplement of*

**A modeling study - Partitioning of Rain and Snow and  
Below-Cloud Scavenging of Size-Resolved Particles by Rain and  
Snow**

Roya Ghahreman, Wanmin Gong, Paul Makar, Alexandru Lupu, Amanda Cole, Kulbir Banwait,  
Colin Lee, Ayodeji Akingunola

Environment and Climate Change Canada, Toronto, Canada

*Correspondence to:* Roya Ghahreman (roya.ghahreman@ec.gc.ca)

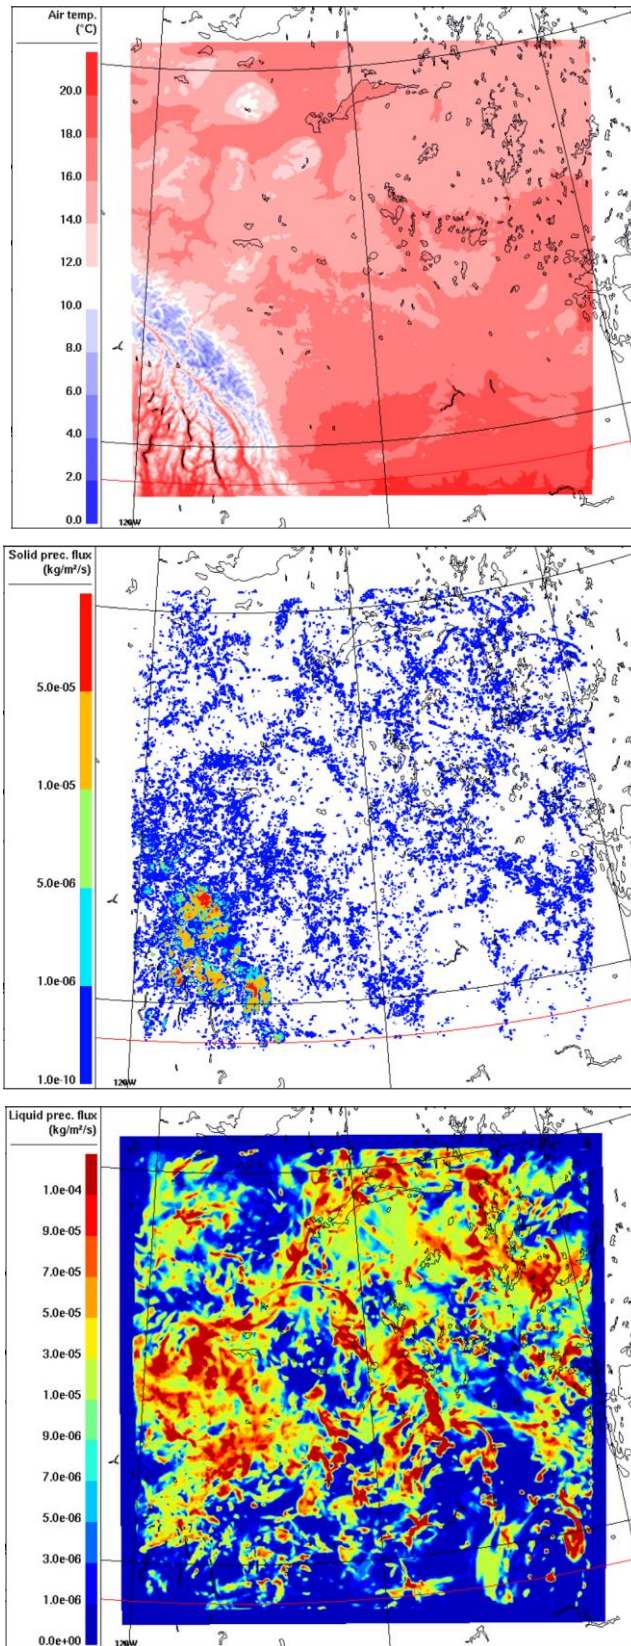

**Figure S1: July average temperature, and total snow and rain fluxes.**

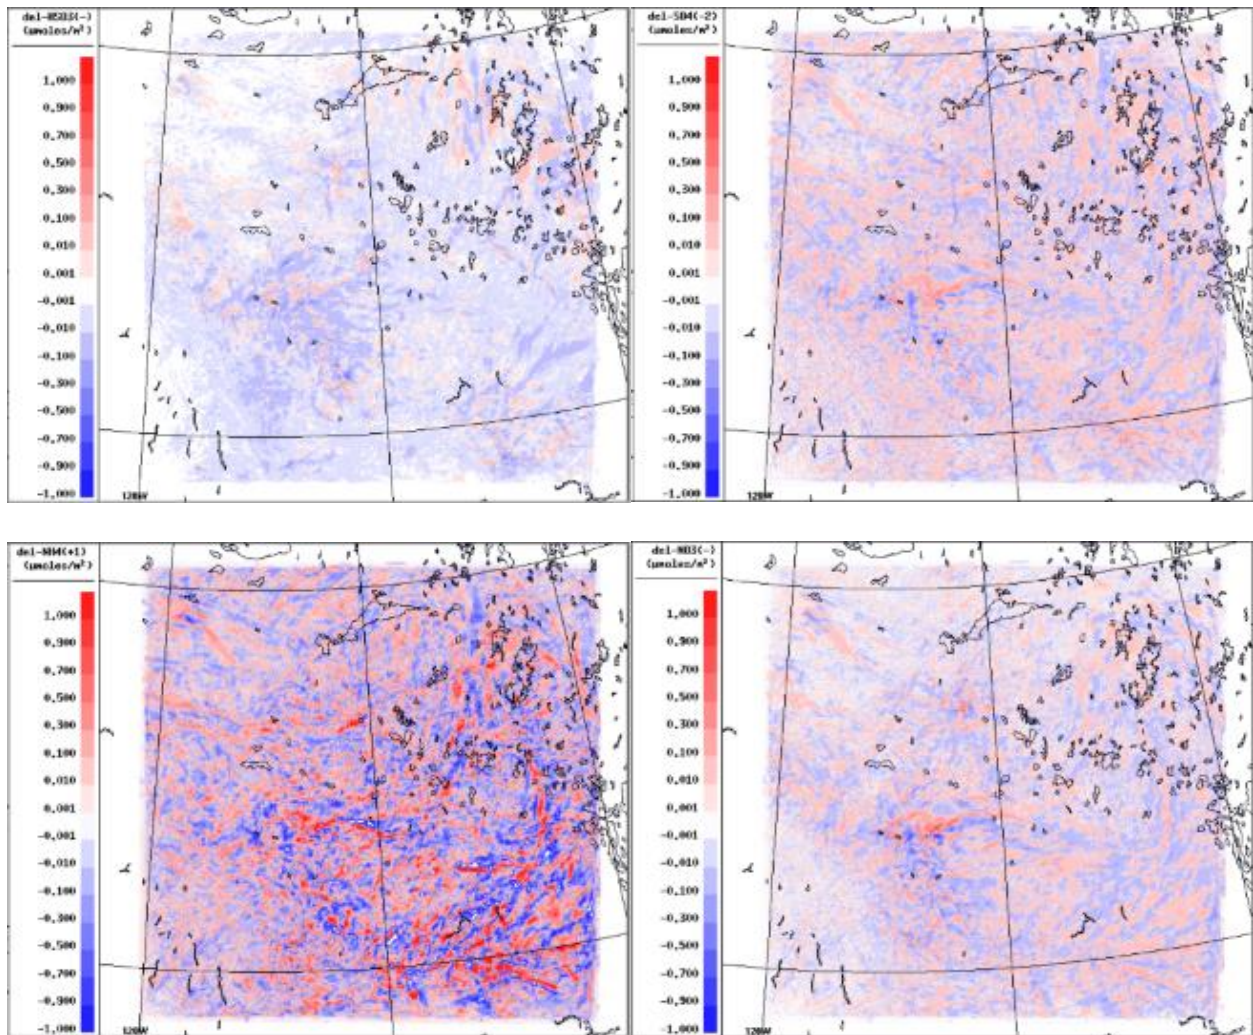

**Figure S2: The net differences of mean  $\text{SO}_3^-$ ,  $\text{SO}_4^-$ ,  $\text{NH}_4^+$  and  $\text{NO}_3^-$  for the partitioned and base experiments (e.g. rain/snow – base) for July 2018.**

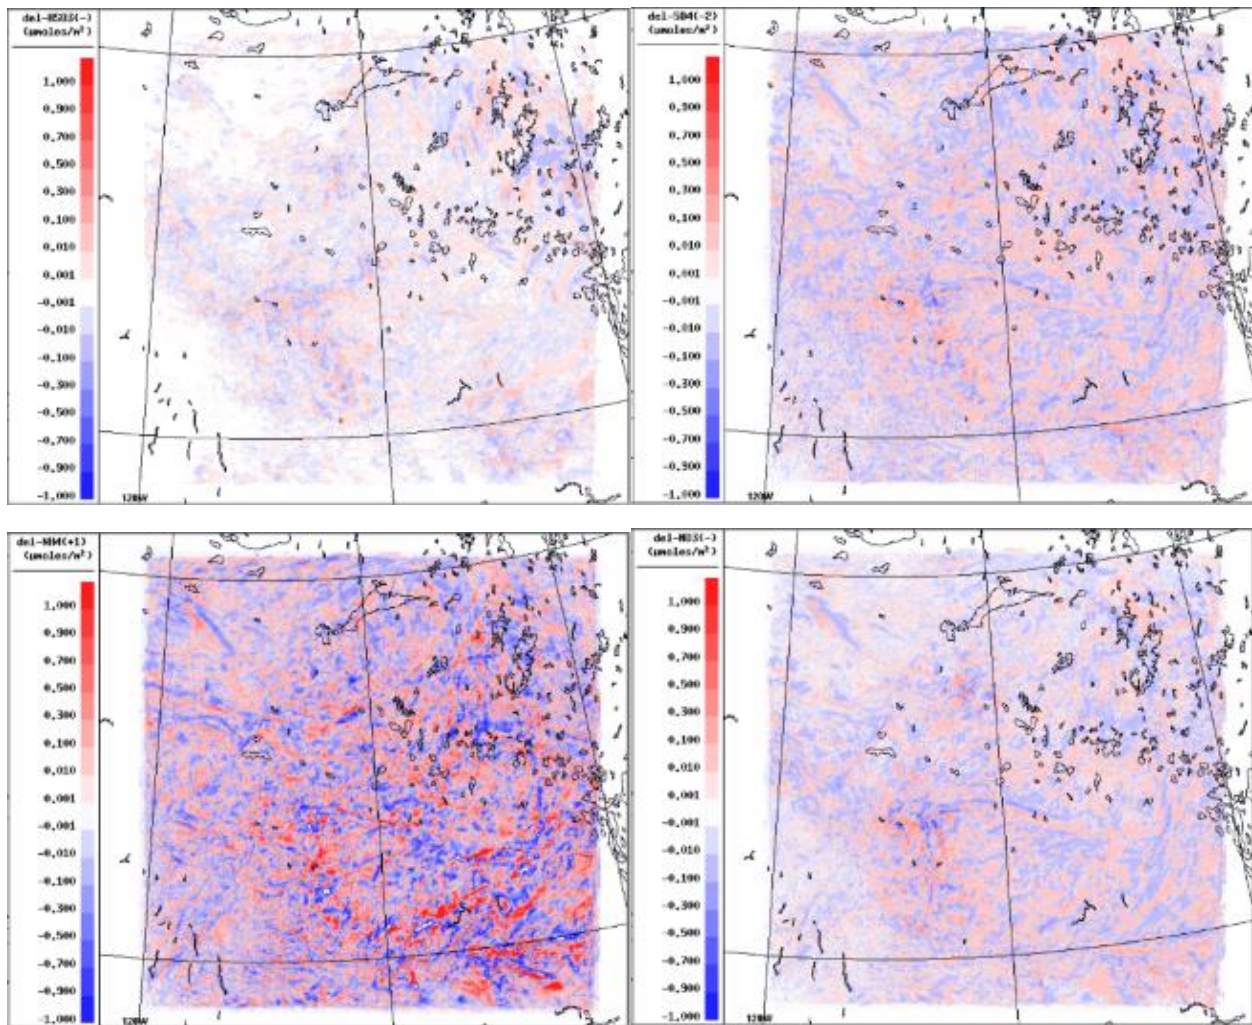

**Figure S3: The net differences of mean  $\text{SO}_3^{1-}$ ,  $\text{SO}_4^-$ ,  $\text{NH}_4^+$  and  $\text{NO}_3^-$  for the Wang2014 and partitioned experiments (e.g. Wang2014 - rain/snow) for July 2018.**

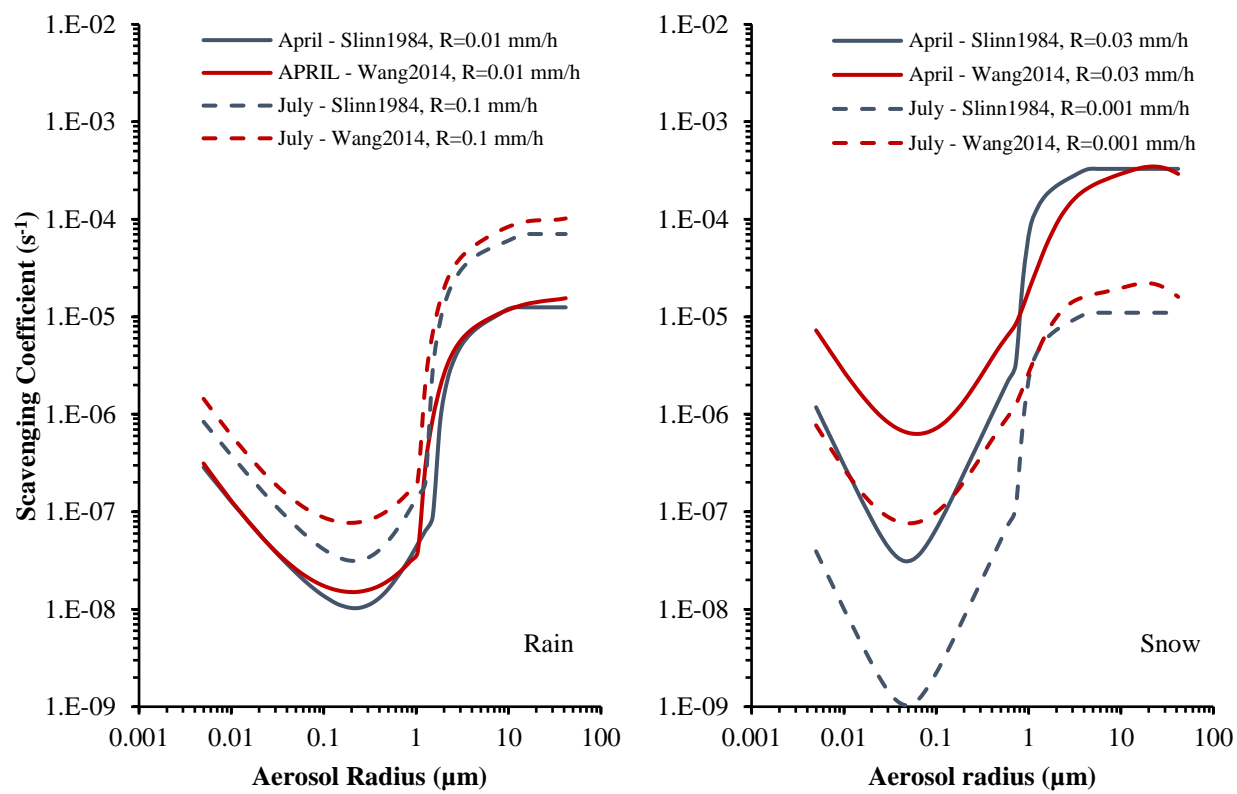

**Figure S4: Rain and snow scavenging coefficients versus the particles sizes for July and April 2018.**
